# Supplementary material for: Immobilization of arrestin-3 on different biosensor platforms for evaluating GPCR binding
Source: Royal Society of Chemistry journal article supplement (doi:10.1039/d0cp01464h), 2020-01-01
Supplement: d0cp01464h1.pdf [file d0cp01464h1.pdf]

## Supporting Information

### Immobilization of Arrestin-3 on different biosensor platforms for evaluating GPCR binding

Saziye Yorulmaz Avsar<sup>\*a</sup>, Larisa E. Kapinos<sup>\*b</sup>, Cora-Ann Schoenenberger<sup>a</sup>,  
Gebhard F.X. Schertler<sup>c,d</sup>, Jonas Mühle<sup>c</sup>, Benoit Meger<sup>c</sup>, Roderick Y.H. Lim<sup>b</sup>,  
Martin K. Ostermeier<sup>e</sup>, Elena Lesca<sup>c,d\*\*</sup>, and Cornelia G. Palivan<sup>a\*\*</sup>

<sup>a</sup> Department of Chemistry and the Swiss Nanoscience Institute, University of Basel, 4002 Basel, Switzerland

<sup>b</sup> Biozentrum and the Swiss Nanoscience Institute, University of Basel, 4056 Basel, Switzerland

<sup>c</sup> Department of Biology and Chemistry, Laboratory of Biomolecular Research, Paul Scherrer Institute, 5303 Villigen-PSI, Switzerland

<sup>d</sup> Department of Biology, ETH Zürich, 8093 Zürich, Switzerland

<sup>e</sup> InterAx Biotech AG, PARK InnovAARE, Villigen, 5234, Switzerland and Paul Scherrer Institute, 5303 Villigen-PSI, Switzerland

\*Equal contribution

\*\*Corresponding authors e-mails: [cornelia.palivan@unibas.ch](mailto:cornelia.palivan@unibas.ch) and [Elena.Lesca@psi.ch](mailto:Elena.Lesca@psi.ch)

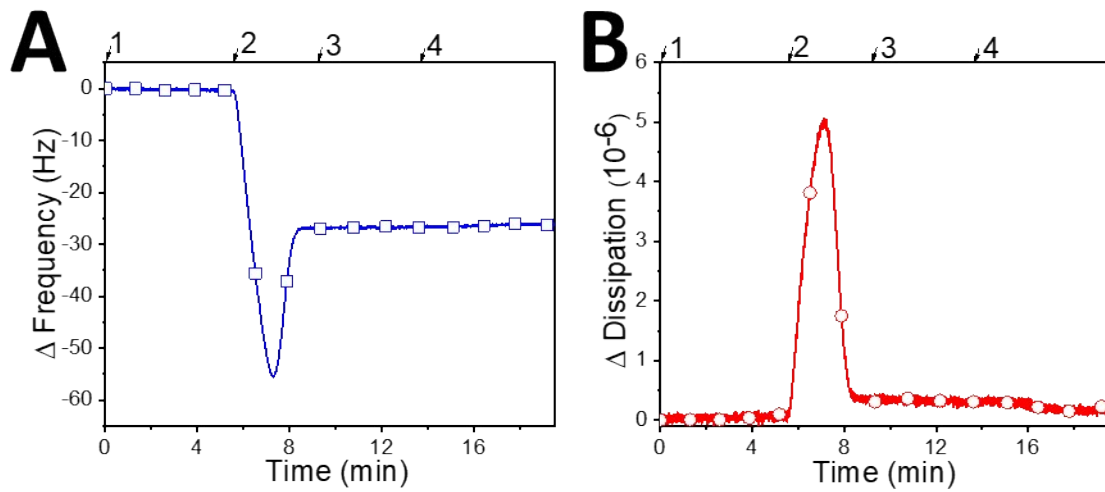

**Figure S1.** Changes in frequency (**A**) and in dissipation (**B**) were recorded as function of time upon formation of supported lipid bilayers on QCM-D sensors via vesicle fusion. The numbers at the top denote the injection of (1) buffer (20 mM HEPES, 150 mM NaCl at pH 7.4) containing 5 mM  $\text{MgCl}_2$ , (2) vesicles made of POPC:DGS-NTA ( $\text{Ni}^{2+}$ ) (95:5), (3) buffer, and (4) buffer without  $\text{MgCl}_2$ .

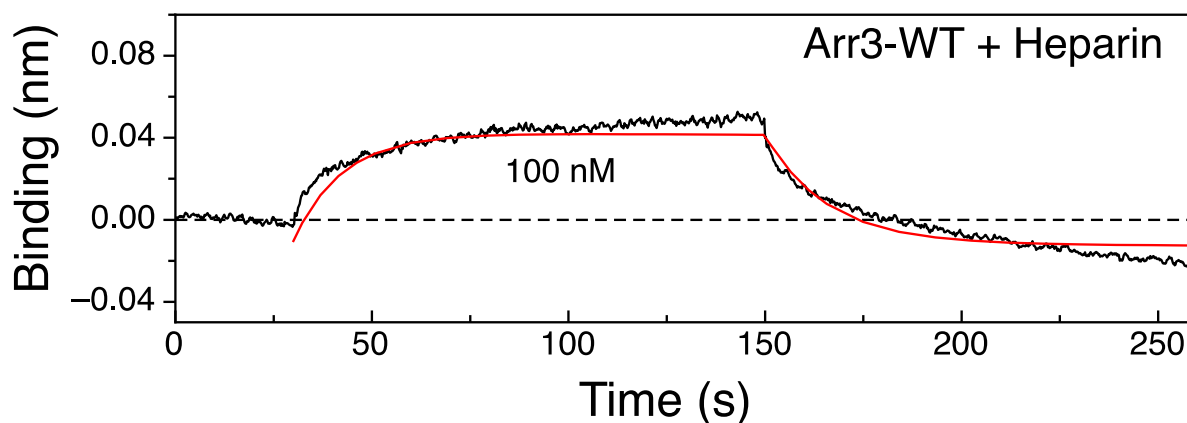

**Figure S2. Detection of heparin binding to Arr3-WT on the BLI sensors.** Representative heparin (100 nM) binding curve measured by BLI for (A) binding to Arr3-WT immobilized on the Ni<sup>2+</sup>-NTA tips. Number of replicates, n= 3 for each Arr3-WT.

**Table S1.** Heparin (100 nM) binding to Arr3-WT

| Proteins | $K_D$ , nM | $k_a \times 10^5$ , M <sup>-1</sup> s <sup>-1</sup> | $k_d$ , s <sup>-1</sup> | Model for kinetic fit |
|----------|------------|-----------------------------------------------------|-------------------------|-----------------------|
| Arr3-WT  | 400 ± 3    | 1.6 ± 0.4                                           | 0.064 ± 0.002           | 1:1 binding           |

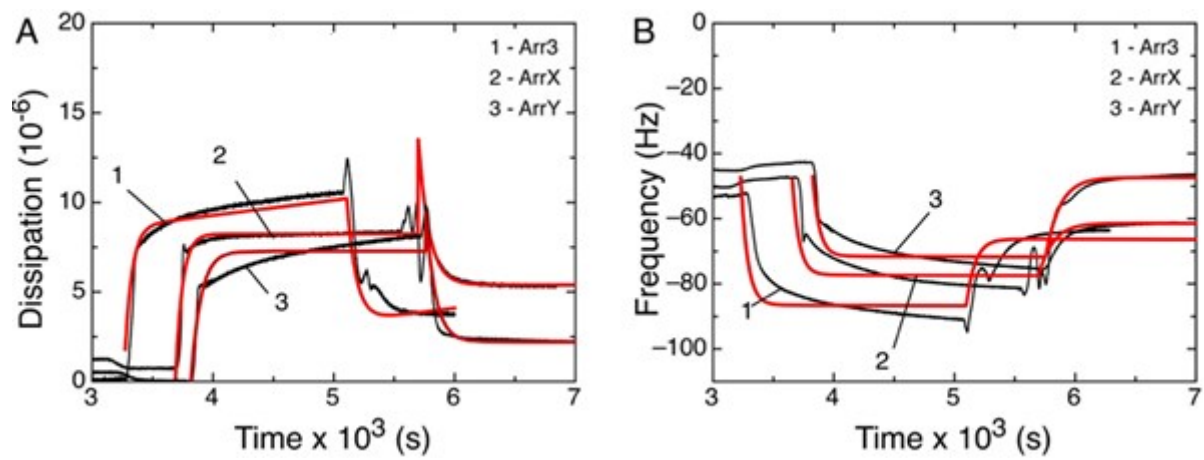

**Figure S3.** The change in dissipation (A) and frequency (B) in the QCM-D measurements caused by the JSR1 (in DDM micelles) complex formation with arrestin-3 was fitted to the 1:1 binding model. Injected concentration of JSR1 was 1.59  $\mu\text{M}$ . Measurement was repeated 3 times for each arrestin ( $n = 3$ ). Obtained kinetic and equilibrium association and dissociation constants are summarized in **Table 6**.

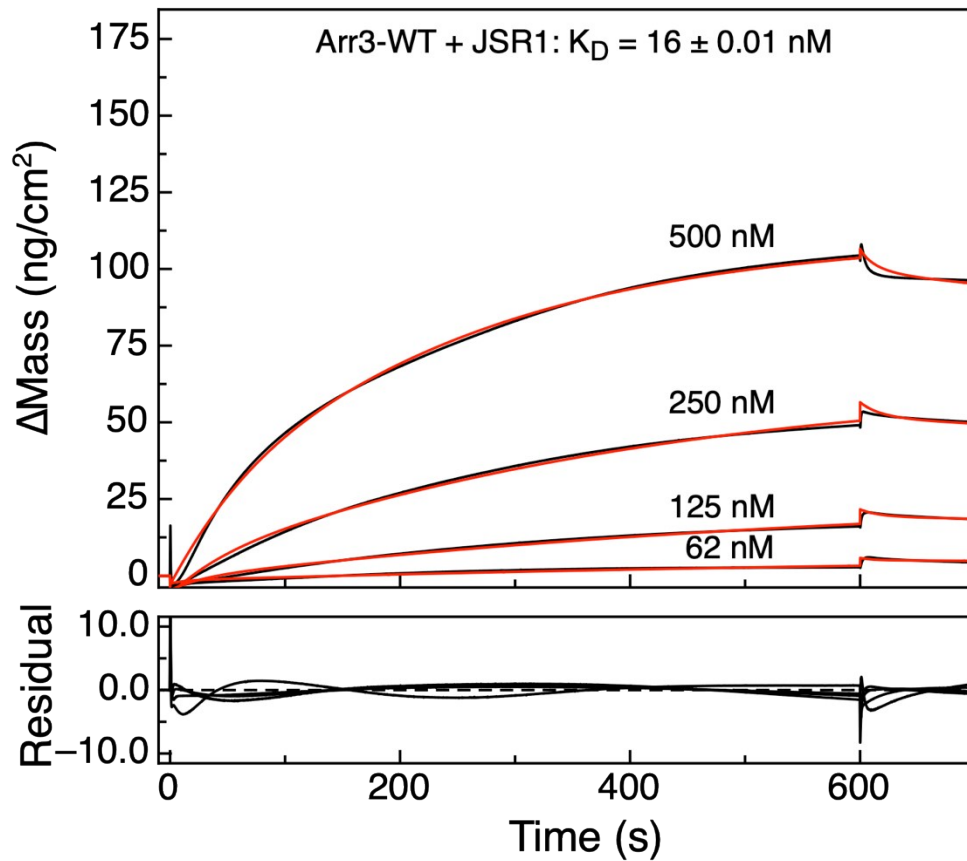

**Figure S4. Analysis of JSR1 binding to Arr3-SLM.** (A) Representative kinetic fit to ‘two-state’ model for JSR1 binding to Arr3-WT immobilized on the Ni<sup>2+</sup>-NTA SLM of HPA sensor chip. Black curves are the experimental data whereas red curves are the fitted data.

**Table S2.** The equilibrium dissociation constants ( $K_D$ ) and kinetic association ( $k_{a1}$  and  $k_{a2}$ ) and dissociation ( $k_{d1}$  and  $k_{d2}$ ) constants obtained for JSR1 (activated) complexes with Arr3 using SPR. Constants were determined by the data fit to the ‘two-state’ model. They represent averages  $\pm$  standard deviations of three independent measurements.

| Proteins | $K_D$ , nM*     | $k_{a1} \times 10^5$ ,<br>$M^{-1}s^{-1}$ | $k_{a2} \times 10^{-3}$ ,<br>$s^{-1}$ | $k_{d1}$ , $s^{-1}$ | $k_{d2}$ , $\times 10^{-3} s^{-1}$ | Model for kinetic fit |
|----------|-----------------|------------------------------------------|---------------------------------------|---------------------|------------------------------------|-----------------------|
| Arr3-WT  | 137 $\pm$ 6.62  | 8980 $\pm$ 1200                          | 7.86 $\pm$ 0.09                       | 306 $\pm$ 53        | 5.29 $\pm$ 0.92                    | Two-state model       |
| Arr3-X   | 18.0 $\pm$ 0.15 | 0.63 $\pm$ 0.006                         | 5.94 $\pm$ 0.14                       | 0.02 $\pm$ 0.002    | 3.89 $\pm$ 0.14                    | Two-state model       |
| Arr3-Y   | 66.2 $\pm$ 20   | 38.7 $\pm$ 14                            | 7.92 $\pm$ 1.01                       | 0.93 $\pm$ 0.35     | 3.01 $\pm$ 0.32                    | Two-state model       |

\* For ‘two-state’ model apparent equilibrium dissociation constants was calculated as follows:

$$K_{Dapp} = \frac{k_{d1} \cdot k_{d2}}{k_{a1} \cdot (k_{a2} + k_{d2})}$$
